# Supplementary material
Source: MDPI journal article supplement (https://www.mdpi.com/2039-4403/11/4/77)
Supplement: s1 [file s1]

# Effects of Maternal Nightshift Work on Evening Energy Intake, Diet Quality and Meal Timing in the Family: An Observational Study

## Supplementary Data

Table S1: Shift Pattern of Nurses

| Family | Day 1 | Day 2 | Day 3 | Day 4 | Day 5 | Day 6 | Day 7 | Day 8 | Day 9 | Day 10 | Day 11 | Day 12 | Day 13 | Day 14 |
|--------|-------|-------|-------|-------|-------|-------|-------|-------|-------|--------|--------|--------|--------|--------|
| A      | NN    | NN    | N     | N     | N     | NN    | NN    | NN    | NN    | NN     | NN     | NN     | NN     | NN     |
| B      | NN    | NN    | NN    | NN    | A     | N     | N     | N     | NN    | NN     | NN     | NN     | NN     | NN     |
| C      | NN    | NN    | S     | NN    | NN    | N     | N     | N     | NN    | NN     | NN     | ANN    | NN     | NN     |
| D      | NN    | N     | N     | N     | NN    | NN    | NN    | NN    | NN    | N      | NN     | NN     | NN     | NN     |
| E      | NN    | NN    | NN    | N     | N     | NN    | NN    | NN    | NN    | NN     | NN     | NN     | NN     | NN     |
| F      | MN    | NN    | NN    | NN    | M     | NN    | NN    | NN    | N     | N      | NN     | NN     | NN     | NN     |
| G      | NN    | NN    | M     | NN    | N     | N     | NN    | NN    | NN    | NN     | S      | NN     | NN     | NN     |
| H      | NN    | N     | N     | N     | NN    | NN    | NN    | NN    | NN    | NN     | NN     | NN     | NN     | NN     |
| I      | NN    | NN    | NN    | NN    | NN    | N     | N     | N     | NN    | NN     | NN     | S      | M      | S      |
| J      | NN    | S     | NN    | NN    | N     | N     | N     | NN    | NN    | NN     | NN     | NN     | NN     | NN     |
| K      | NN    | NN    | NN    | N     | N     | N     | NN    | NN    | NN    | NN     | NN     | NN     | NN     | NN     |
| L      | NN    | NN    | NN    | NN    | N     | N     | N     | NN    | NN    | NN     | NN     | S      | N      | N      |
| M      | NN    | NN    | TW    | NN    | NN    | NN    | NN    | N     | N     | NN     | NN     | NN     | NN     | NN     |
| N      | NN    | NN    | NN    | N     | N     | NN    | NN    | NN    | NN    | NN     | NN     | NN     | NN     | NN     |
| O      | NN    | N     | N     | N      | N      | N      | NN     | NN     |
| P      | NN    | NN    | N     | N     | NN    | NN    | NN    | NN    | NN    | NN     | NN     | NN     | NN     | NN     |
| Q      | NN    | MN    | N     | N     | N     | NN    | M     | NN    | M     | NN     | NN     | NN     | NN     | M      |
| R      | NN    | N     | N     | NN    | NN    | N     | NN    | NN    | NN    | NN     | NN     | NN     | NN     | NN     |
| S      | ANN   | ANN   | M     | NN     | N      | N      | N      | NN     |
| T      | NN    | NN    | N     | NN    | N     | N     | NN    | N     | NN    | NN     | NN     | NN     | NN     | NN     |

Note: N=Night shift; NN = Non-night shift.
